# Supplementary material
Source: PubMed Central journal article supplement (PMC4702515)
Supplement: NIHMS748327-supplement-Supplemental.pdf [file NIHMS748327-supplement-Supplemental.pdf]

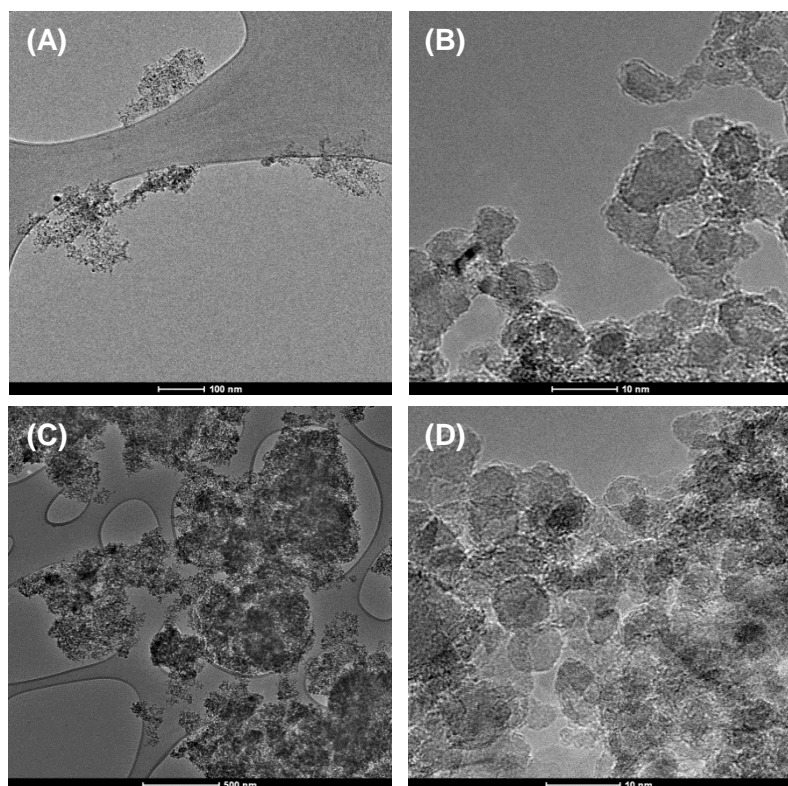

Figure S1: TEM images of the ECNs originally suspended in water (A and B) and organic solvent (C and D) show that the ECNs have a tendency to aggregate into sub micron particle size in media, even though they are about 5-10 nm in the dry powder state. The aggregates show these individual particles in higher resolution images ( B and D). Scale: A: 100 nm, B, D: 10 nm, C: 500 nm.

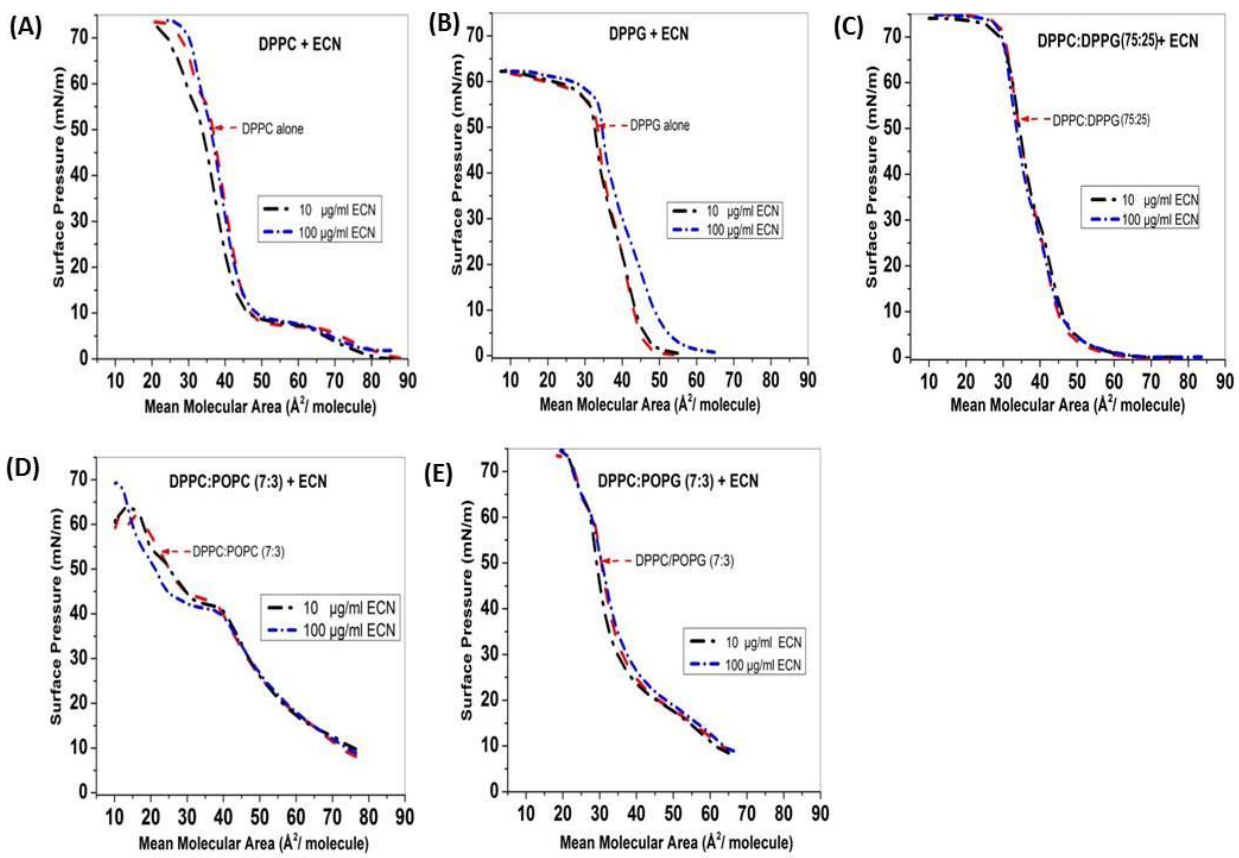

Figure S2: Surface Pressure vs. area per molecule isotherms of (A) DPPC (B) DPPG (C) DPPC:DPPG (75:25) (D) DPPC:POPC (7:3) (E) DPPC:POPG (7:3) monolayers obtained after one hour of incubation with 1 wt % (10  $\mu\text{g/ml}$ ) and 10 wt% (100 $\mu\text{g/ml}$ ) ECN.

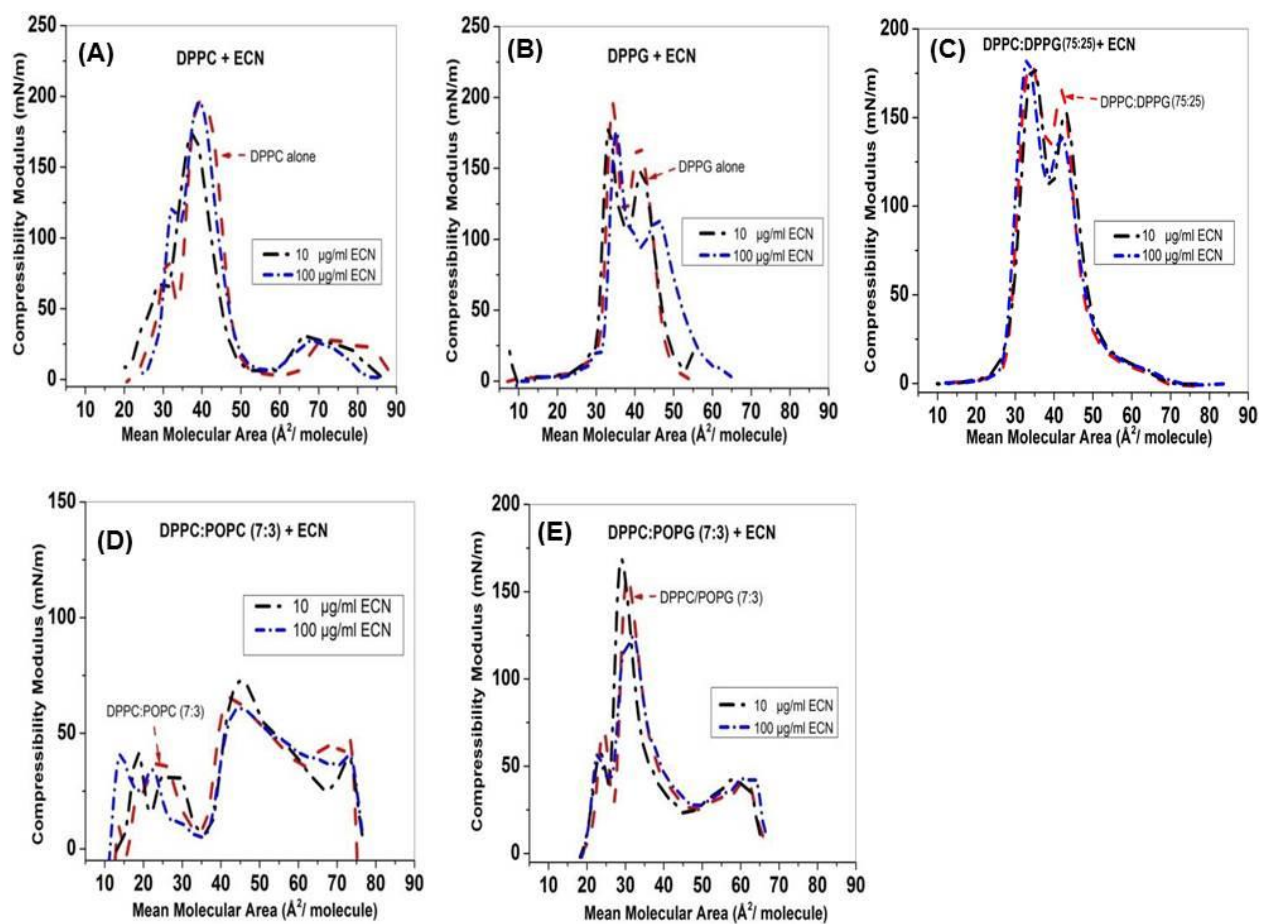

Figure S3: Compressibility Modulus vs. area per molecule isotherms for (A) DPPC (B) DPPG (C) DPPC: DPPG (75:25) (D) DPPC:POPC (7:3) (E) DPPC:POPG (7:3) monolayers obtained after one hour of incubation with 1 wt % (10 mg/ml) and 10 wt% (100µg/ml) ECN.

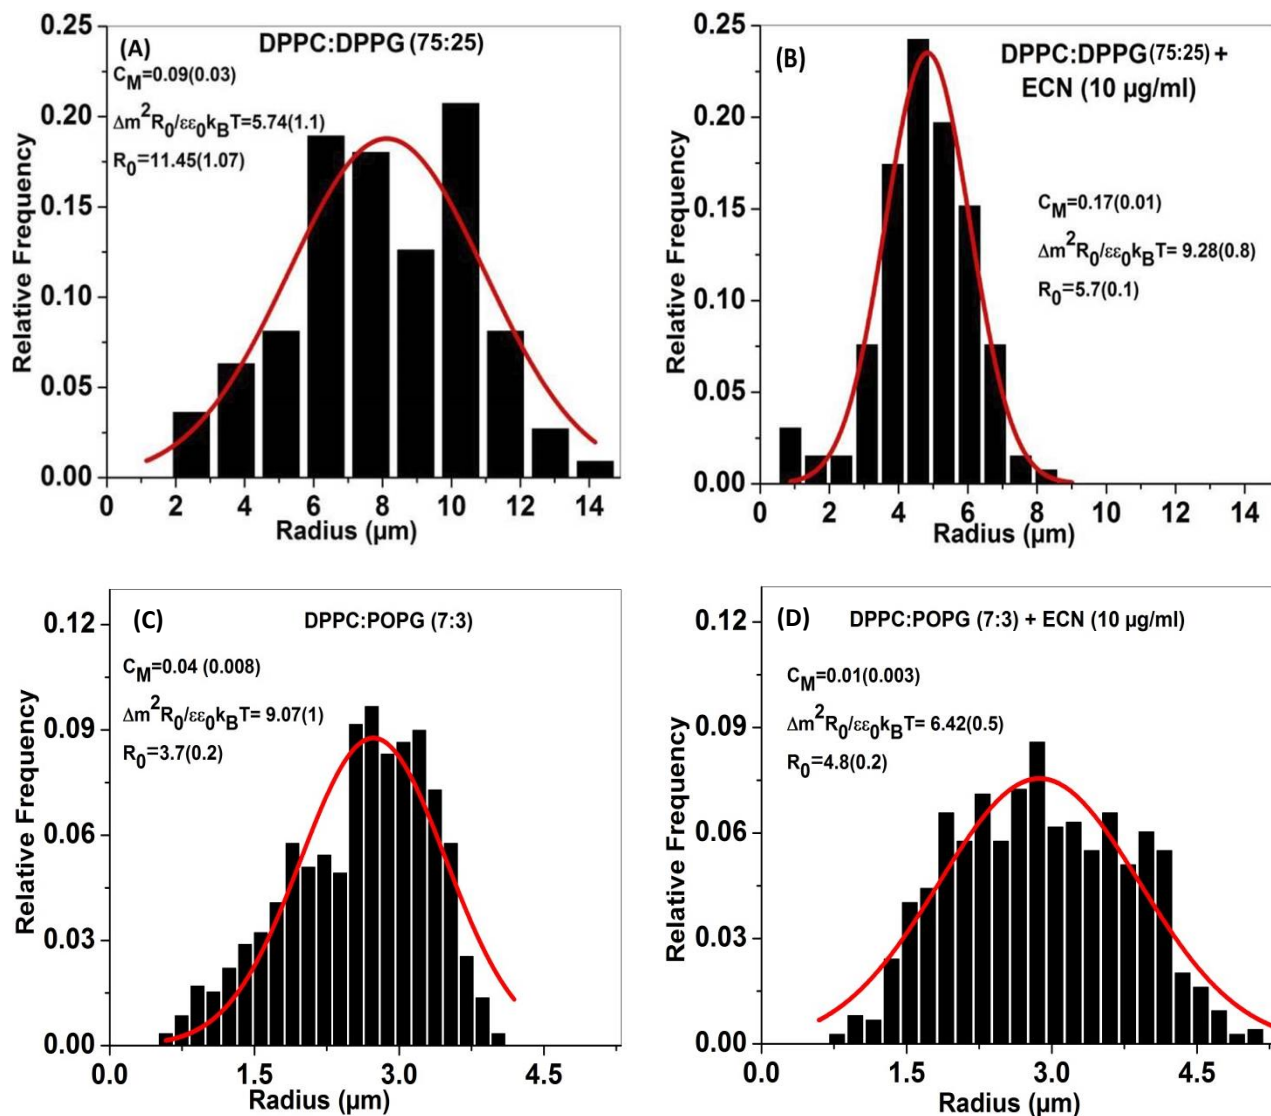

Figure S4: Analysis of domain size distribution of DPPC:DPPG and DPPC:POPG monolayers in the absence (A,C) and presence (B,D) of ECNs. The red curve shows the fit to Equation 4 in the main text. The curve fitting yielded an average adjusted R-Squared value of 0.87, indicating the good quality of the fit. The fitting parameters are also shown.

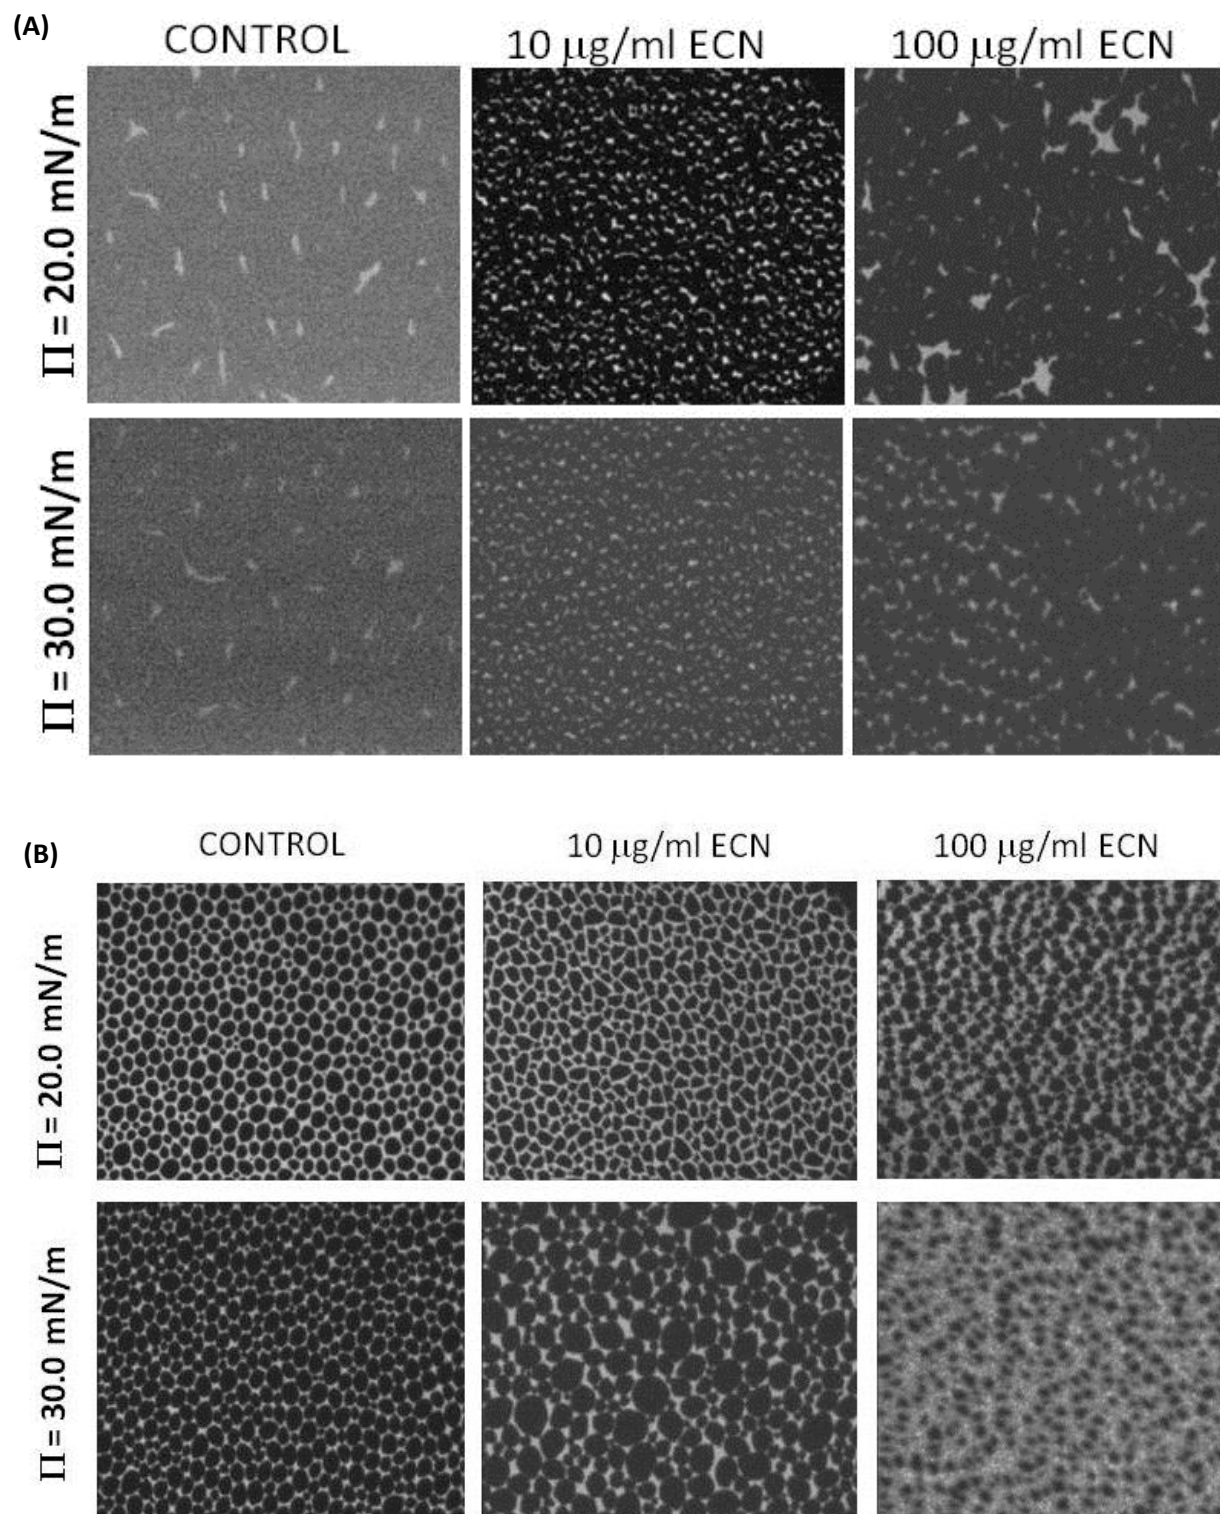

Figure S5: Comparison of ECN induced alterations in lipid domains as a result of exposure to different concentrations of ECN (A) DPPG (B) DPPC:POPG mixture.

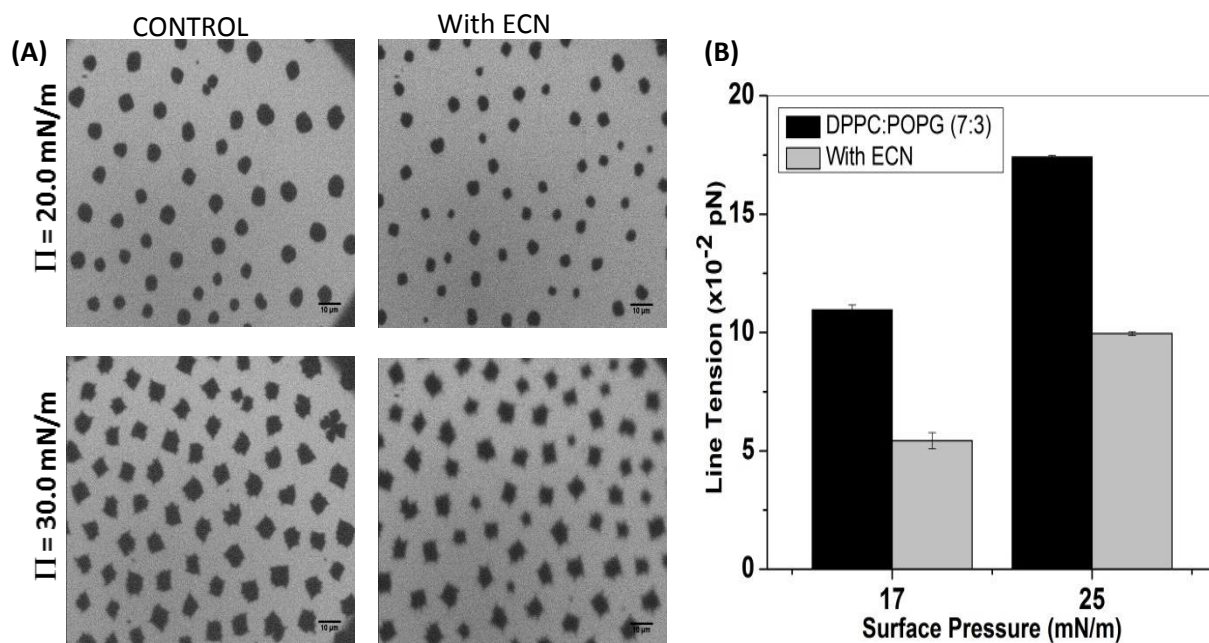

Figure S6: (A) Fluorescence images of DPPC:POPG films without and with ECN spread on a PBS buffer sub-phase at two representative surface pressures. (B) Line tension analysis from the domain size distributions in (A) show a significant decrease in the line tension in the presence of ECNs.

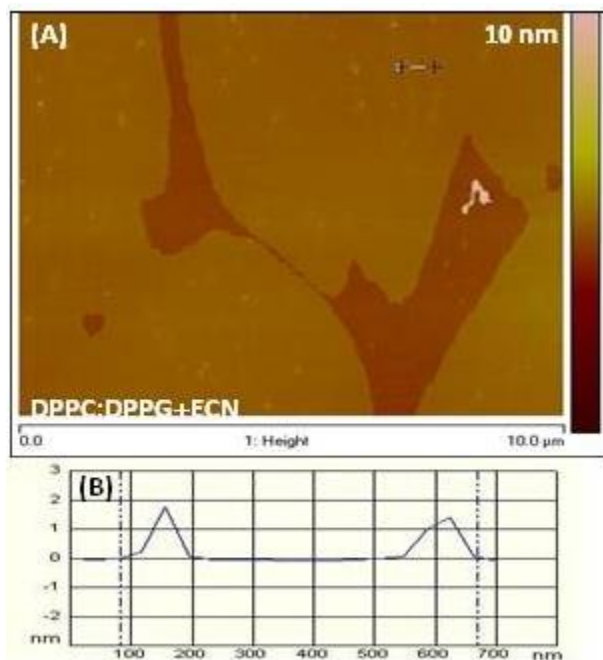

Fig S7: Detailed height analysis within a condensed domain shows that unlike the significant height change in the LE phase, the raised features within the LC domain do not correspond to ECN aggregates of size  $\sim 250 \text{ nm}$ , since the height of these features is significantly lower than that expected for ECN aggregates that contain carbon nanodiamonds of diameter 5-10 nm.

**Tables:**

| Sample            | Saturated | Net charge |
|-------------------|-----------|------------|
| DPPC              | Yes       | Neutral    |
| DPPG              | Yes       | Anionic    |
| DPPC:DPPG (75:25) | Yes       | Anionic    |
| DPPC:POPC (7:3)   | No        | Neutral    |
| DPPC:POPG (7:3)   | No        | Anionic    |

**Table S1:** List of phospholipid combinations studied along with their overall charge and saturation.

| ECN<br>in                    | Particle Size<br>(nm) | Poly-dispersity |
|------------------------------|-----------------------|-----------------|
| Water                        | 219                   | 0.19            |
| Chloroform/ methanol mixture | 240                   | 0.35            |
| Lipid/organic mixture        | 130                   | 0.41            |

**Table S2:** Particle size analysis of the ECNs in different media relevant to the experimental conditions.
